# Supplementary material for: Two-dimensional confinement for generating thin single crystals for applications in time-resolved electron diffraction and spectroscopy: an intramolecular proton transfer study
Source: Royal Society of Chemistry journal article supplement (doi:10.1039/d2cc02468c), 2022-01-01
Supplement: d2cc02468c1.pdf [file d2cc02468c1.pdf]

## Supporting Information

# Two-Dimensional Confinement for Generating Thin Single Crystals for Applications in Time-Resolved Electron Diffraction and Spectroscopy: An Intramolecular Proton Transfer Study

Hyein Hwang,<sup>a,b</sup> Vandana Tiwari,<sup>c</sup> Hong-Guang Duan,<sup>d</sup> Simon F. Bittmann,<sup>b</sup> Friedjof Tellkamp,<sup>b</sup> Ajay Jha<sup>\*c</sup> and R. J. Dwayne Miller<sup>\*f</sup>

<sup>a</sup> Department of Chemistry, University of Hamburg, Martin-Luther-King Platz 6, 20146 Hamburg, Germany.

<sup>b</sup> Max Planck Institute for the Structure and Dynamics of Matter, Center for Free Electron Laser Science, Luruper Chaussee 149, 22761 Hamburg, Germany.

<sup>c</sup> European XFEL, Holzkoppel 4, 22869 Schenefeld, Germany.

<sup>d</sup> Department of Physics, Ningbo University, Ningbo 315211, China.

<sup>e</sup> The Rosalind Franklin Institute, Rutherford Appleton Laboratory, Harwell Campus, Didcot, Oxfordshire, OX11 0FA, United Kingdom. E-mail: [ajay.jha@rfi.ac.uk](mailto:ajay.jha@rfi.ac.uk)

<sup>f</sup> The Departments of Chemistry and Physics, University of Toronto, 80 St. George Street, Toronto Canada M5S 3H6. E-mail: [dmiller@lphys.chem.utoronto.ca](mailto:dmiller@lphys.chem.utoronto.ca)

## Table of Contents

|                                                                                                                                                 |    |
|-------------------------------------------------------------------------------------------------------------------------------------------------|----|
| Materials and Methods.....                                                                                                                      | 4  |
| Materials .....                                                                                                                                 | 4  |
| Crystallization.....                                                                                                                            | 4  |
| Characterizations.....                                                                                                                          | 4  |
| Steady state absorption measurements.....                                                                                                       | 4  |
| Femtosecond Transient absorption measurements.....                                                                                              | 5  |
| Calculation and data analysis.....                                                                                                              | 5  |
| Supporting Figures and Tables .....                                                                                                             | 6  |
| Figure S1. Schematic drawing of crystal growth from solution assisted with spatial confinement.....                                             | 6  |
| Figure S2. Crystal growth morphology of 1,5-DHAQ in open area by variation of initial concentration and initial temperature. ....               | 7  |
| Figure S3. Crystal growth morphology of 1,5-DHAQ in confined area by variation of initial concentration and initial temperature.....            | 7  |
| Figure S4. Crystal growth morphology after different temperature treatments. ....                                                               | 8  |
| Figure S5. Height profiles at the edges of each crystal by AFM. ....                                                                            | 9  |
| Figure S6. Topography of 1,5-DHAQ thin crystal. ....                                                                                            | 10 |
| Figure S7. Optical image of crystals using the 2D confinement method.....                                                                       | 11 |
| Table S1. Lattice parameters of 1,5-DHAQ .....                                                                                                  | 12 |
| Table S2. D-spacing of crystal planes shown in Fig. 1e. ....                                                                                    | 13 |
| Figure S8. Illustration of crystallographic planes go through molecular planes.....                                                             | 14 |
| .....                                                                                                                                           | 15 |
| Figure S9. Characterization of TA-measured samples. ....                                                                                        | 15 |
| Table S3. Calculated electronic excited state energies and oscillator strengths of 1,5-DHAQ crystal and solution.....                           | 16 |
| Table S4. Transitions contribute to the first excitation. ....                                                                                  | 17 |
| Figure S10. $S_0 \rightarrow S_1$ Transition dipole moments of 1,5-DHAQ molecules. ....                                                         | 18 |
| Table S5. Calculated intermolecular Coulomb coupling between the transition dipole moments depicted in Fig. S5.....                             | 19 |
| Figure S11. 2-dimensional colour plot of transient absorption spectra of 1,5-DHAQ. ....                                                         | 20 |
| Figure S12. Decay-associated difference spectra.....                                                                                            | 21 |
| Table S6. Specifications of crystal and solution samples measured transient absorption. ....                                                    | 22 |
| Table S7. Time components of the kinetic traces in Fig. 4 given with exponential fit parameters and physical assignments on the components..... | 23 |

|                                                                                                                           |    |
|---------------------------------------------------------------------------------------------------------------------------|----|
| Figure S13. Photon fluence dependence. ....                                                                               | 24 |
| Figure S14. 1,5-DHAQ crystal model containing 8 molecules in a unit cell used for electronic excitation calculation. .... | 25 |
| Table S8. Coordinates of input files for electronic excitation calculation. ....                                          | 26 |
| Acknowledgement .....                                                                                                     | 33 |
| References.....                                                                                                           | 33 |

## **Materials and Methods**

### **Materials**

1,5-Dihydroxyanthraquinone (1,5-DHAQ, technical grade, > 85%) and chloroform (analytical standard) were purchased from Sigma-Aldrich. V-1 grade 0.26 mm muscovite mica block was purchased from Sungil Industries. Mica is cut and cleaved into proper dimension (edge length 10 to 15 mm and thickness around 0.2 mm) to soak in a 20 ml vial.

### **Crystallization**

Mica sheets were heated at 105 °C for 10 minutes on hot plate and rinsed with acetone to remove surface impurities. Two mica sheets are stacked in a 20 mL vial with diameter of 2 cm and 2 mL of 8.3 mM solution of 1,5-DHAQ in chloroform was added in the vial (Figure S1). The vial is closed with its lid and heated for 10 minutes at 60 °C, which is slightly below the boiling point of chloroform (61.2 °C). Then we set the temperature of the hot plate at 40 °C and left the vial on it for 10 minutes, and then brought the vial to room temperature space. We opened the lid after 10 minutes and covered it with aluminium foil with one pin hole made by 0.8 mm needle. The vial was left in stable place for 5 days for solvent to completely evaporate. The evaporation time is approximately 1-2 days longer in confined area than open area. To prepare samples for Transmission electron microscope (TEM), we put carbon film coated TEM grid on a mica sheet in the batch of crystallization. Crystals having same shape as those on mica sheet grew on the carbon film.

### **Characterizations**

Optical images are taken by Olympus SZX10 with DP27 camera and analyzed by Stream Basic software and ImageJ. Crystal topography was observed with NanoWizard® 4 XP BioScience Atomic force microscope (AFM) in intermittent contact mode [1]. X-ray diffraction (XRD) was measured with 4-Circle Single Crystal Diffractometer SuperNova from Oxford Diffraction. Transmission electron microscopy (TEM) data are taken with CryoTEM JEOL JEM-2100F. We used carbon film coated 200 mesh Copper grid. Crystal structure analysis and powder diffraction pattern simulation was performed with VESTA. TEM images are analyzed with Gatan DigitalMicrograph.

### **Steady state absorption measurements**

Steady state absorption measurements of solution and crystals have been performed on a home-built absorption spectrophotometer. Light sources employed in the set-up are deuterium and halogen lamps, which provide white light in the range of 215 – 2500 nm. The transmitted light is collected by spectrometer (Avantes, AvaSpec-ULS2048-USB2-UA-50). To measure absorption spectra, crystals are placed on a quartz substrate attached on a lens mount and solution sample is contained in a 1 mm quartz cuvette.

Absorption spectrum is plotted as the logarithm of transmitted spectrum through the bare substrate or pure solvent divided by that through a crystal on substrate or solution sample.

### **Femtosecond Transient absorption measurements**

Transient absorption measurements of 1,5-DHAQ in solution and crystalline form have been performed on a home-built transient absorption (TA) set up. The details of the setup have been described previously [2]. Briefly, the TA setup uses Nd based commercial laser, PHAROS by Light conversion. The fundamental beam wavelength is 1030 nm with output power of 1 W at the repetition rate of 1 kHz. The fundamental laser beam is divided to pump and probe beams using a beam splitter: 20% of the beam is guided to focus on a 3 mm YAG crystal to generate a white light as probe beam, and the remaining 80% of fundamental beam is directed to generate 343 nm pump beam using third harmonic generation process. The pump beam is chopped using a Thorlabs chopper operating at 500 Hz, and the pump energy is controlled using set of neutral density filters. The diameters of pump and probe beams at the sample position are 190  $\mu\text{m}$  and 100  $\mu\text{m}$ , respectively. Time delay between pump and probe is controlled by 150 mm linear motorized delay stage from Newport. Probe spectra for each time-delay are detected with the combination of a spectrograph (9055, Scintec) and a charge-coupled device linear image sensor (CCD; S11156-2048-02, Hamamatsu Photonics). All the experiments were performed under room temperature. The concentration of the solution sample was 80  $\mu\text{M}$ . Time-resolved absorption spectra were measured with  $\sim 200$ -fs time resolution. Transient absorption data were analyzed with Python GUI coded by Simon Bittmann.

### **Calculation and data analysis**

The vertical excitation energies are calculated with time-dependent density functional theory (TDDFT) using Gaussian 09 package [3]. We adopted coordinates of 8 1,5-DHAQ molecules in a unit cell from CIF file of DHANTQ02 [4] posted at Cambridge Structural Database as crystal model. The geometries of crystal and solution model were optimized at B3LYP/6-31G and B3LYP/6-31G(d) level, respectively. Coulomb coupling between transition dipole moments of two molecules was calculated by Fortran code written by Hong-Guang Duan.

## Supporting Figures and Tables

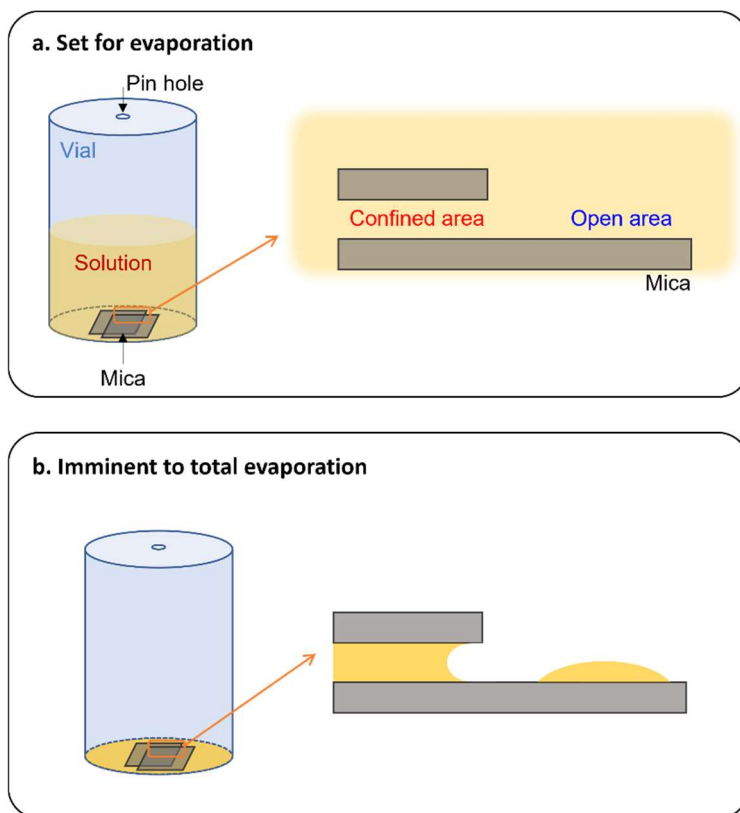

Figure S1. Schematic drawing of crystal growth from solution assisted with spatial confinement.

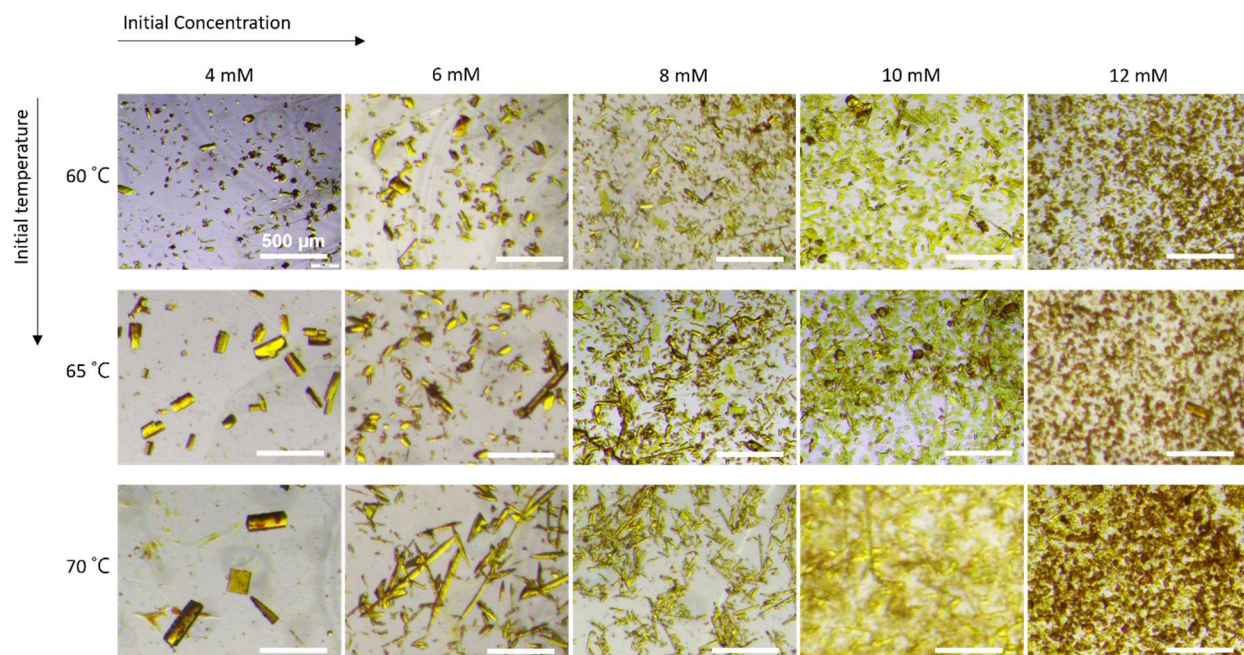

**Figure S2. Crystal growth morphology of 1,5-DHAQ in open area by variation of initial concentration and initial temperature.** Initial volume is all set to be 2 ml. Initial temperature was maintained for 10 minutes, and then the vials were left under room temperature. The vials were opened for evaporation after 10 minutes. Scale bar is 500  $\mu\text{m}$  for all panels.

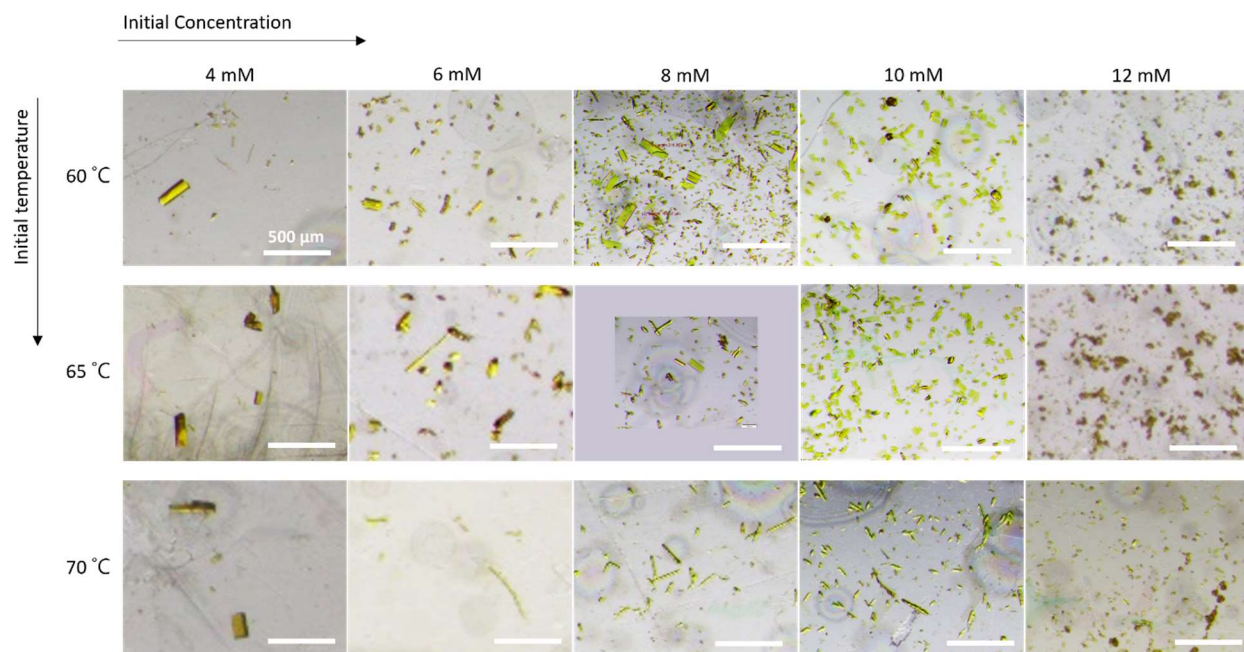

**Figure S3. Crystal growth morphology of 1,5-DHAQ in confined area by variation of initial concentration and initial temperature.** Scale bar is 500  $\mu\text{m}$  for all panels.

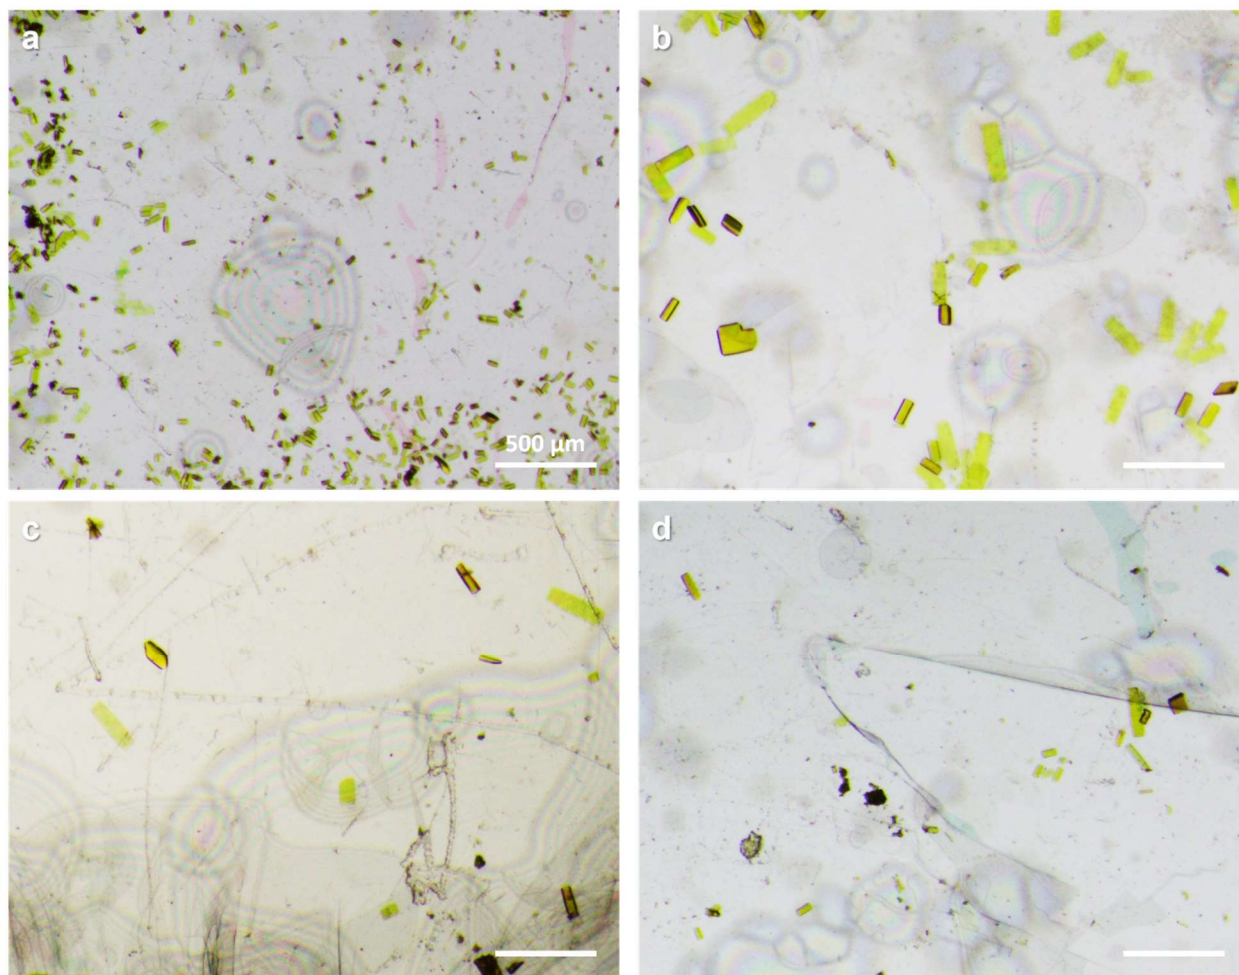

**Figure S4. Crystal growth morphology after different temperature treatments.** (a) 60 °C |10 min – RT | 10 min – Evaporation. (b) 60 °C |10 min – 40 °C |10 min – RT | 10 min – Evaporation. (c) 60 °C |20 min – 40 °C |20 min – RT | 10 min – Evaporation. (d) 60 °C |10 min – 50 °C |10 min – 40 °C |10 min – 30 °C |10 min – RT | 10 min – Evaporation. Scale bar is 500  $\mu\text{m}$  for all panels.



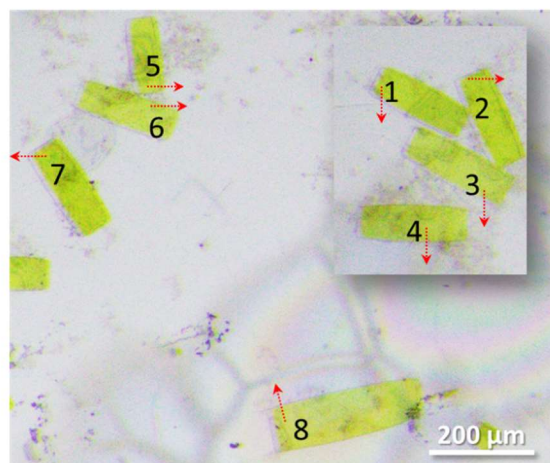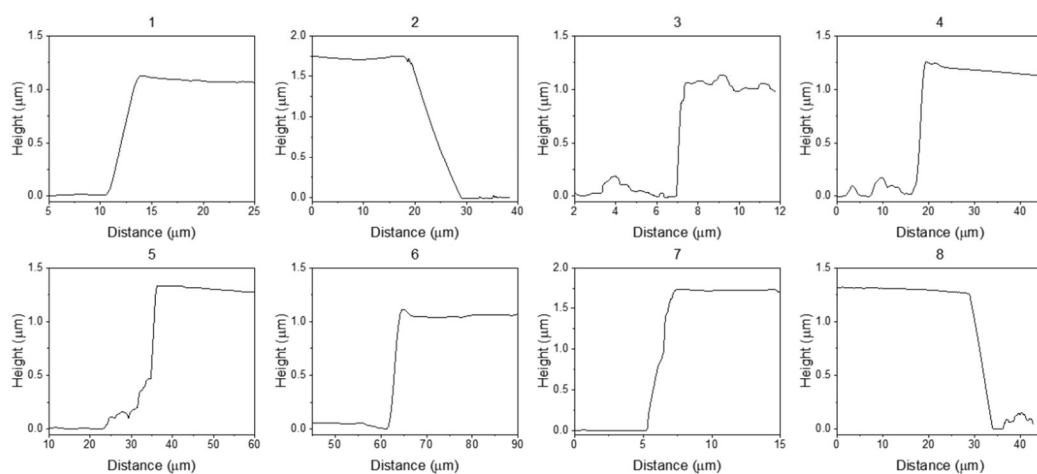

**Figure S5. Height profiles at the edges of each crystal by AFM. Red arrows represent tracing direction.**

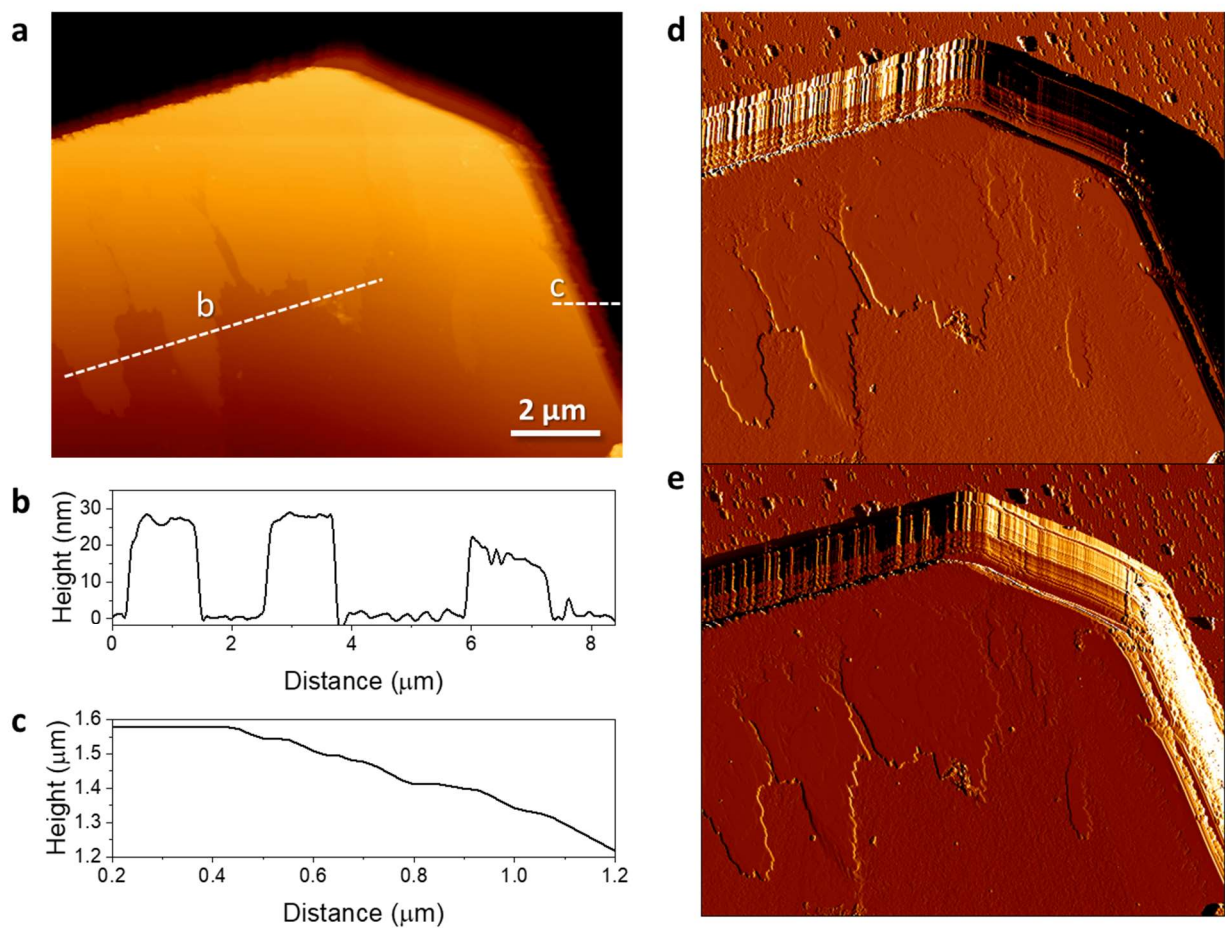

**Figure S6. Topography of 1,5-DHAQ thin crystal.** (a) AFM height image. (b, c) Height profile. Each profile is traced along the dashed lines in (a) correspondingly. The background of surface is subtracted in profile (b). (d, e) Error signal image of trace and retrace, respectively.

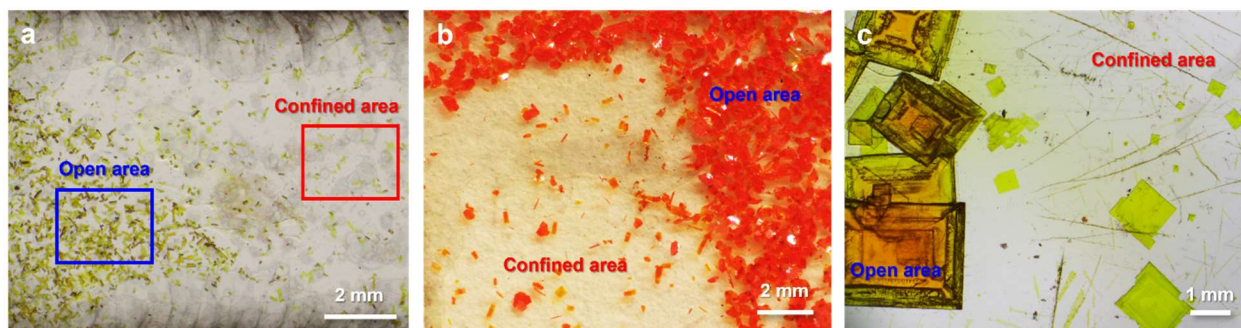

**Figure S7. Optical image of crystals using the 2D confinement method.** (a) 1,5-DHAQ presented in the main manuscript, (b) 1,4-DHAQ, (c) 1,8-DHAQ.

**Table S1. Lattice parameters of 1,5-DHAQ [4].**

|                           |                    |
|---------------------------|--------------------|
| Crystal system            | Monoclinic         |
| Space group (point group) | P2 <sub>1</sub> /c |
| a (Å)                     | 6.0092(5)          |
| b (Å)                     | 5.3074(2)          |
| c (Å)                     | 15.7538(6)         |
| $\alpha$ (deg)            | 90                 |
| $\beta$ (deg)             | 93.672(5)          |
| $\gamma$ (deg)            | 90                 |

**Table S2. D-spacing of crystal planes shown in Fig. 1e.** Calculation with reference data and analysis with selected area electron diffraction (SAED) pattern by TEM.

| h | k | l | d (Å), Calculated | d (Å), Analyzed |
|---|---|---|-------------------|-----------------|
| 0 | 0 | 2 | 7.86              | 7.38            |
| 1 | 1 | 0 | 3.97              | 4.15            |
| 1 | 1 | 2 | 3.49              | 3.62            |

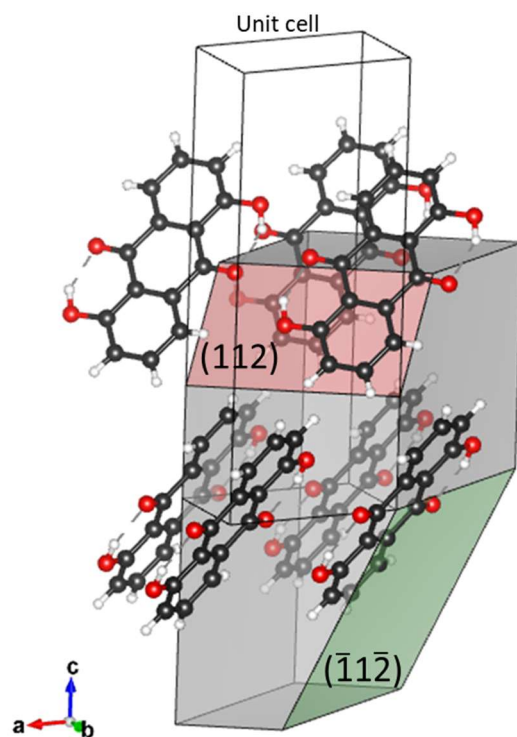

**Figure S8. Illustration of crystallographic planes go through molecular planes.** Red plane  $(112)$  represents the face of upper stacks of molecules in the figure, and green plane  $(\bar{1}\bar{1}\bar{2})$  represents the molecular planes of lower stacks. Grey planes are arbitrary planes.

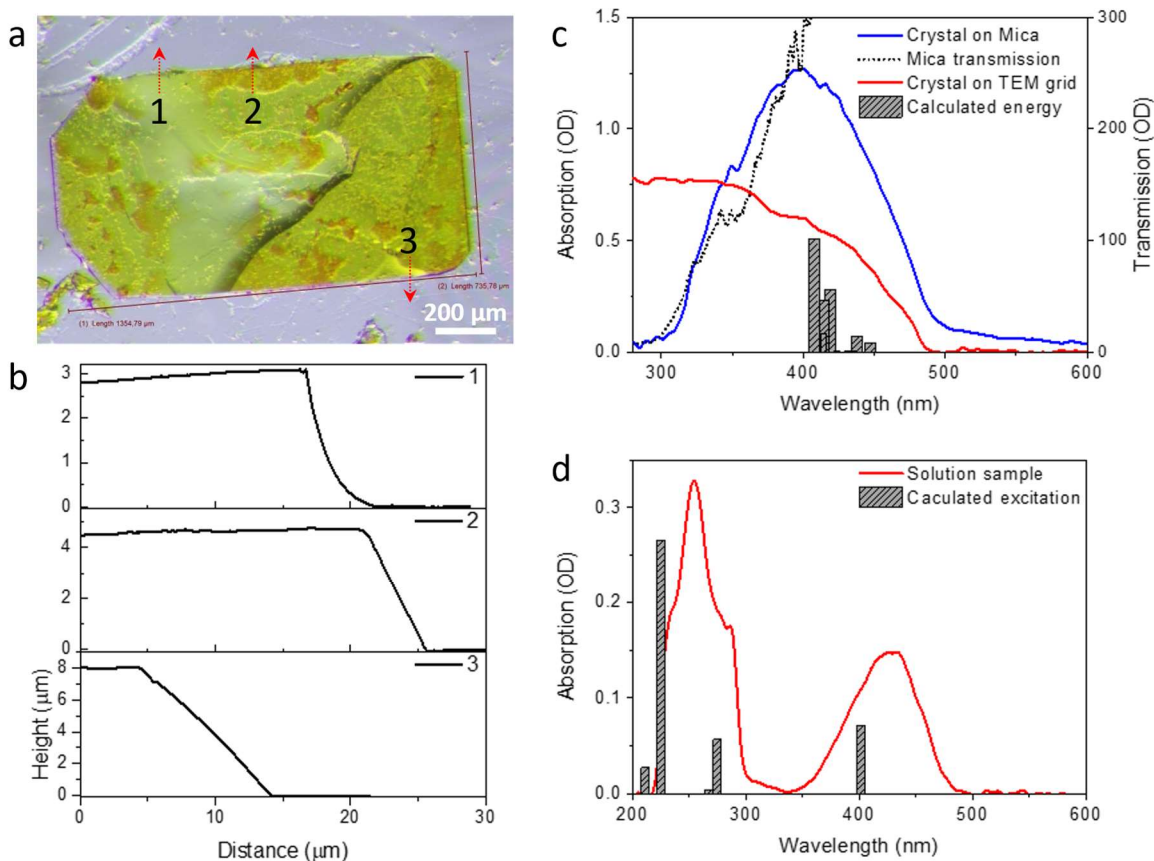

**Figure S9. Characterization of TA-measured samples.** (a) Optical image of 1,5-DHAQ crystal used for TA measurement. (b) Height profile measured by AFM. Traced line is marked with red arrow in (a) correspondingly. (c) Absorption spectrum 1,5-DHAQ crystal. Spectrum of crystal on mica (blue line) is cut off below 300 nm due to opaqueness of mica in UV region. Dotted line is transmission spectrum measured at mica substrate. Spectrum of crystal on TEM grid (red line) shows continuous absorption below 300 nm. Columns are positioned at the wavelengths of the calculated excitation energies with heights representing relative oscillator strength. (d) Absorption spectra of 1,5-DHAQ solution in acetonitrile. Columns represent the calculated energies with relative oscillator strengths. The values of calculated excitation energies and corresponding oscillator strengths are listed in Table S3.

**Table S3. Calculated electronic excited state energies and oscillator strengths of 1,5-DHAQ crystal and solution.**

|          | Excited state* | Excitation energy (nm) | Oscillator strength |
|----------|----------------|------------------------|---------------------|
| Crystal  | 1              | 449.01                 | 0.0007              |
|          | 3              | 447.30                 | 0.0197              |
|          | 6              | 438.10                 | 0.0356              |
|          | 8              | 433.02                 | 0.0034              |
|          | 10             | 422.25                 | 0.0027              |
|          | 12             | 418.76                 | 0.1403              |
|          | 14             | 414.48                 | 0.1174              |
|          | 16             | 412.20                 | 0.0415              |
|          | 18             | 409.11                 | 0.0346              |
|          | 20             | 407.40                 | 0.2534              |
| Solution | 1              | 401.00                 | 0.2365              |
|          | 6              | 274.59                 | 0.1902              |
|          | 8              | 266.85                 | 0.0148              |
|          | 13             | 224.78                 | 0.8851              |
|          | 14             | 224.64                 | 0.0005              |
|          | 18             | 210.92                 | 0.0924              |
| 20       | 205.32         | 0.0001                 |                     |

\*States with oscillator strength equal to zero are omitted.



**Table S4. Transitions contribute to the first excitation.**

|          | Transition      | Amplitude |
|----------|-----------------|-----------|
| Crystal  | HOMO-3 → LUMO   | 0.13166   |
|          | HOMO-1 → LUMO+1 | 0.31358   |
|          | HOMO → LUMO     | 0.52727   |
|          | HOMO → LUMO+2   | -0.27189  |
| Solution | HOMO → LUMO     | 0.70262   |

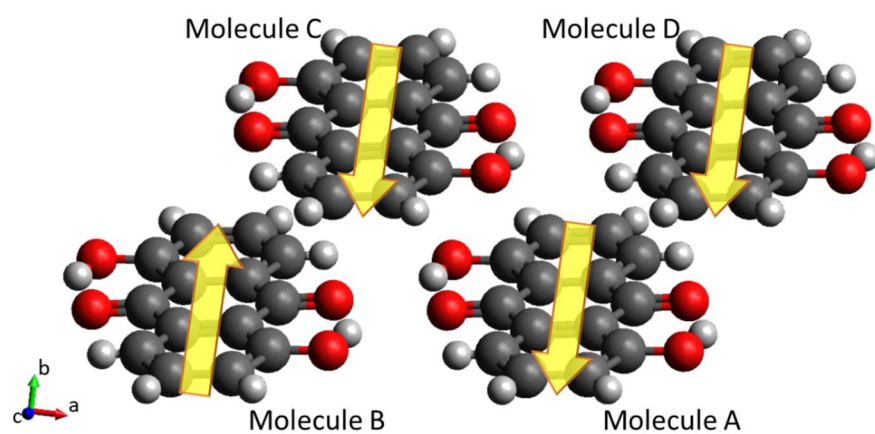

**Figure S10.  $S_0 \rightarrow S_1$  Transition dipole moments of 1,5-DHAQ molecules.** The direction of the dipole moment is depicted with yellow arrows.

**Table S5. Calculated intermolecular Coulomb coupling between the transition dipole moments depicted in Fig. S5.**

---

|                         |                          |
|-------------------------|--------------------------|
| Molecule B ↔ Molecule A | -302.73 cm <sup>-1</sup> |
| Molecule C ↔ Molecule A | 382.86 cm <sup>-1</sup>  |
| Molecule D ↔ Molecule A | 539.78 cm <sup>-1</sup>  |

---

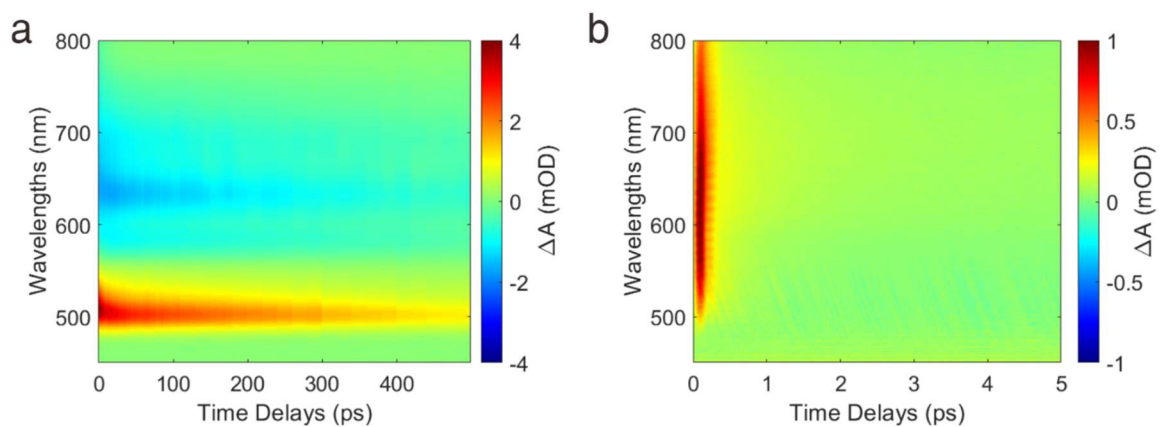

**Figure S11. 2-dimensional colour plot of transient absorption spectra of 1,5-DHAQ. (a) Solution and (b) crystal.**

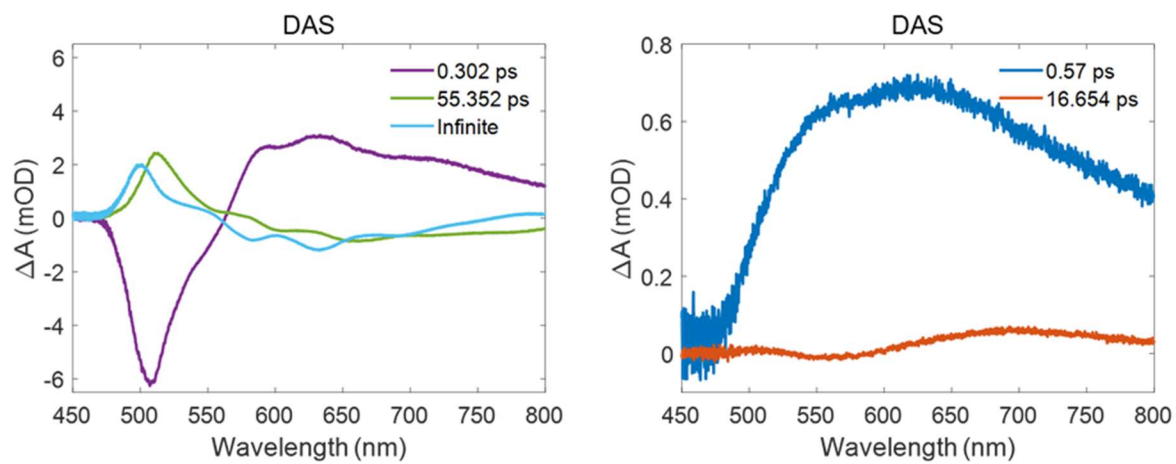

**Figure S12.** Decay-associated difference spectra of 1,5-DHAQ solution (left) and crystal (right).

**Table S6. Specifications of crystal and solution samples measured transient absorption.**

|                          | Crystal                                                         | Solution                                   |
|--------------------------|-----------------------------------------------------------------|--------------------------------------------|
| Absorbance at 343 nm     | 0.84 OD                                                         | 0.078 OD                                   |
| Density (crystal)        | 1.51 g·cm <sup>-3</sup> [4]                                     |                                            |
| Thickness (crystal)      | 3.88 – 8.00 μm                                                  |                                            |
| Concentration (solution) |                                                                 | 7.96·10 <sup>-8</sup> mol·cm <sup>-3</sup> |
| Fluence                  | 1.1 mJ·cm <sup>-2</sup>                                         | 2.7 mJ·cm <sup>-2</sup>                    |
| Cross-section            | 2.63·10 <sup>-19</sup> – 7.02·10 <sup>-19</sup> cm <sup>2</sup> | 1.63·10 <sup>-16</sup> cm <sup>2</sup>     |
| Excitation fraction      | 0.05 – 0.14 %                                                   | 7.68 %                                     |

**Table S7. Time components of the kinetic traces in Fig. 4 given with exponential fit parameters and physical assignments on the components.**

|                 | <b>Wavelength</b> | <b><math>\tau_1</math> (ps) / Assignment</b>       | <b><math>\tau_2</math> (ps) / Assignment</b>  | <b><math>\tau_3</math> (ps) / Assignment</b> |
|-----------------|-------------------|----------------------------------------------------|-----------------------------------------------|----------------------------------------------|
| <b>Solution</b> | <b>500 nm</b>     | $0.279 \pm 0.014$ (rise)<br>Proton transfer        | $40 \pm 11$<br>Non-radiative decay            | $> 500$<br>$S_1$ state decay                 |
|                 | <b>630 nm</b>     | $3.8 \pm 1.7$ (rise)<br>Vibrational redistribution | $250 \pm 50$<br>$S_1$ state decay             |                                              |
| <b>Crystal</b>  | <b>565 nm</b>     | $< 0.2$                                            | $0.56 \pm 0.06$<br>Vibrational redistribution |                                              |
|                 | <b>670 nm</b>     | $< 0.2$                                            | $0.78 \pm 0.20$<br>Vibrational redistribution | $9 \pm 5$<br>$S_1$ state decay               |

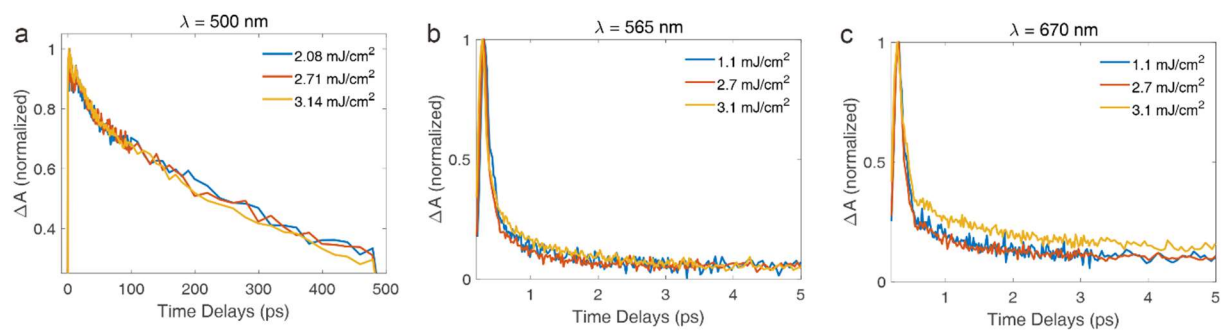

**Figure S13. Photon fluence dependence.** Normalized kinetic traces of 1,5-DHAQ solution with different photon fluence at 500 nm (a) and crystal at 565 nm (b) and 670 nm (c).



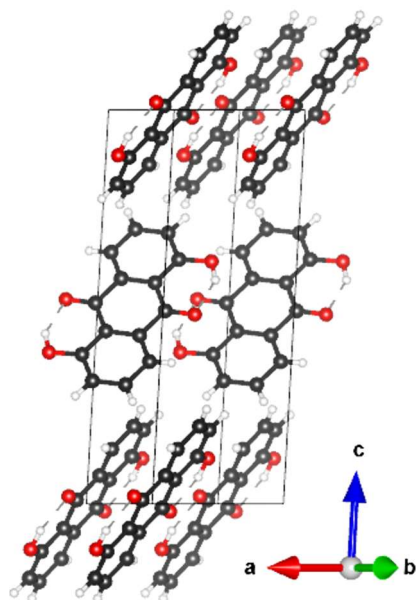

**Figure S14. 1,5-DHAQ crystal model containing 8 molecules in a unit cell used for electronic excitation calculation.**

**Table S8. Coordinates of input files for electronic excitation calculation.**

|   | X         | Y        | Z         |
|---|-----------|----------|-----------|
| O | 2.866014  | 4.284133 | 1.812999  |
| O | 2.134240  | 1.023267 | 13.908460 |
| O | 2.638713  | 1.630433 | 6.047731  |
| O | 2.361542  | 3.676967 | 9.673728  |
| O | 1.885403  | 1.879350 | 0.304053  |
| O | 3.114851  | 3.428050 | 15.417405 |
| O | 3.619324  | 4.533050 | 7.556676  |
| O | 1.380931  | 0.774350 | 8.164782  |
| C | 3.866127  | 5.174715 | 1.894436  |
| C | 1.134127  | 0.132685 | 13.827023 |
| C | 1.638600  | 2.521015 | 5.966294  |
| C | 3.361655  | 2.786385 | 9.755165  |
| C | 3.832780  | 0.774350 | 2.947773  |
| C | 1.167474  | 4.533051 | 12.773685 |
| C | 1.671947  | 3.428050 | 4.912956  |
| C | 3.328308  | 1.879350 | 10.808503 |
| C | 4.815314  | 1.712167 | 3.097127  |
| C | 0.184940  | 3.595233 | 12.624331 |
| C | 0.689413  | 4.365867 | 4.763602  |
| C | 4.310842  | 0.941533 | 10.957856 |
| C | -0.138340 | 1.792840 | 2.183711  |
| C | 5.138594  | 3.514560 | 13.537748 |
| C | 5.643067  | 4.446540 | 5.677019  |
| C | -0.642812 | 0.860860 | 10.044440 |
| C | 5.916524  | 0.907035 | 1.135089  |
| C | -0.916269 | 4.400366 | 14.586369 |
| C | -0.411797 | 3.560735 | 6.725640  |
| C | 5.412051  | 1.746665 | 8.995819  |
| C | 4.923783  | 5.231504 | 0.966870  |
| C | 0.076471  | 0.075896 | 14.754589 |
| C | 0.580944  | 2.577804 | 6.893860  |

|   |           |           |           |
|---|-----------|-----------|-----------|
| C | 4.419310  | 2.729596  | 8.827599  |
| C | 1.030704  | 1.009468  | 0.157215  |
| C | 3.969551  | 4.297933  | 15.564244 |
| C | 4.474023  | 3.663168  | 7.703515  |
| C | 0.526231  | 1.644233  | 8.017944  |
| H | 3.095066  | 0.705884  | 3.553050  |
| H | 1.905189  | 4.601516  | 12.168409 |
| H | 2.409661  | 3.359584  | 4.307680  |
| H | 2.590593  | 1.947816  | 11.413779 |
| H | 0.505723  | 2.425482  | 2.232447  |
| H | 4.494531  | 2.881918  | 13.489011 |
| H | 4.999004  | 5.079182  | 5.628282  |
| H | 0.001251  | 0.228218  | 10.093176 |
| H | 4.811590  | 2.292797  | 3.773150  |
| H | 0.188664  | 3.014603  | 11.948309 |
| H | 0.693137  | 4.946497  | 4.087579  |
| H | 4.307118  | 0.360903  | 11.633879 |
| H | 3.008102  | 3.736410  | 1.069059  |
| H | 1.992153  | 1.570990  | 14.652399 |
| H | 2.496625  | 1.082710  | 6.791670  |
| H | 2.503629  | 4.224691  | 8.929788  |
| C | 3.832780  | 6.081750  | 2.947773  |
| C | 1.167474  | -0.774350 | 12.773685 |
| C | 3.866127  | -0.132685 | 1.894436  |
| C | 1.134127  | 5.440085  | 13.827023 |
| C | 5.870860  | 1.792840  | 2.183711  |
| C | -0.870606 | 3.514560  | 13.537748 |
| C | -0.366133 | 4.446540  | 5.677019  |
| C | 5.366388  | 0.860860  | 10.044440 |
| C | -0.092676 | 0.907035  | 1.135089  |
| C | -1.193886 | 1.712167  | 3.097127  |
| C | 6.194140  | 3.595233  | 12.624331 |
| C | 5.092931  | 4.400366  | 14.586369 |

|   |           |           |           |
|---|-----------|-----------|-----------|
| C | 6.698613  | 4.365867  | 4.763602  |
| C | 5.597404  | 3.560735  | 6.725640  |
| C | -0.597149 | 1.746665  | 8.995819  |
| C | -1.698359 | 0.941533  | 10.957856 |
| C | 4.923783  | -0.075896 | 0.966870  |
| C | 7.039904  | 1.009468  | 0.157215  |
| C | -2.039649 | 4.297933  | 15.564244 |
| C | 0.076471  | 5.383296  | 14.754589 |
| C | -1.535177 | 3.663168  | 7.703515  |
| C | 6.535431  | 1.644233  | 8.017944  |
| C | 4.978496  | 4.297933  | -0.157215 |
| C | 5.916524  | 6.214435  | 1.135089  |
| C | -0.916269 | -0.907035 | 14.586369 |
| C | 0.021759  | 1.009468  | 15.878673 |
| C | 1.085417  | 0.075896  | -0.966870 |
| C | 3.914838  | 5.231504  | 16.688328 |
| H | 3.095066  | 6.013284  | 3.553050  |
| C | 4.815314  | 7.019568  | 3.097127  |
| C | 0.184940  | -1.712167 | 12.624331 |
| H | 1.905189  | -0.705884 | 12.168409 |
| O | 2.866014  | -1.023267 | 1.812999  |
| O | 2.134240  | 6.330667  | 13.908460 |
| H | 6.514923  | 2.425482  | 2.232447  |
| H | -1.514669 | 2.881918  | 13.489011 |
| H | -1.010196 | 5.079182  | 5.628282  |
| H | 6.010451  | 0.228218  | 10.093176 |
| C | -1.085417 | -0.075896 | 0.966870  |
| C | -2.176420 | 0.774350  | 2.947773  |
| H | -1.197610 | 2.292797  | 3.773150  |
| H | 6.197864  | 3.014603  | 11.948309 |
| C | 7.176674  | 4.533051  | 12.773685 |
| C | 6.085672  | 5.383296  | 14.754589 |
| C | 7.681147  | 3.428050  | 4.912956  |

|   |           |           |           |
|---|-----------|-----------|-----------|
| H | 6.702337  | 4.946497  | 4.087579  |
| C | 6.590144  | 2.577804  | 6.893860  |
| C | -1.589890 | 2.729596  | 8.827599  |
| H | -1.702082 | 0.360903  | 11.633879 |
| C | -2.680893 | 1.879350  | 10.808503 |
| C | 4.978496  | -1.009468 | -0.157215 |
| C | 7.094617  | 0.075896  | -0.966870 |
| O | 7.894604  | 1.879350  | 0.304053  |
| O | -2.894349 | 3.428050  | 15.417405 |
| C | -2.094362 | 5.231504  | 16.688328 |
| C | 0.021759  | 6.316868  | 15.878673 |
| O | -2.389876 | 4.533050  | 7.556676  |
| O | 7.390131  | 0.774350  | 8.164782  |
| O | 4.123797  | 3.428050  | -0.304053 |
| C | 6.101876  | 4.400366  | -1.135089 |
| C | 7.039904  | 6.316868  | 0.157215  |
| C | 5.870860  | 7.100240  | 2.183711  |
| C | -0.870606 | -1.792840 | 13.537748 |
| C | -2.039649 | -1.009468 | 15.564244 |
| C | -1.101622 | 0.907035  | 16.856548 |
| O | 0.876458  | 1.879350  | 16.025511 |
| C | 0.092676  | -0.907035 | -1.135089 |
| C | 2.143073  | 0.132685  | -1.894436 |
| C | 2.857182  | 5.174715  | 17.615894 |
| C | 4.907578  | 6.214435  | 16.856548 |
| H | 4.811590  | 7.600197  | 3.773150  |
| H | 0.188664  | -2.292797 | 11.948309 |
| H | 3.008102  | -1.570990 | 1.069059  |
| H | 1.992153  | 6.878391  | 14.652399 |
| C | -2.143073 | -0.132685 | 1.894436  |
| C | -1.030704 | -1.009468 | -0.157215 |
| H | -2.914134 | 0.705884  | 3.553050  |
| H | 7.914389  | 4.601516  | 12.168409 |

|   |           |           |           |
|---|-----------|-----------|-----------|
| C | 7.143327  | 5.440085  | 13.827023 |
| C | 6.030959  | 6.316868  | 15.878673 |
| H | 8.418861  | 3.359584  | 4.307680  |
| C | 7.647800  | 2.521015  | 5.966294  |
| C | -2.647546 | 2.786385  | 9.755165  |
| H | -3.418607 | 1.947816  | 11.413779 |
| O | 4.123797  | -1.879350 | -0.304053 |
| C | 6.101876  | -0.907035 | -1.135089 |
| C | 8.152273  | 0.132685  | -1.894436 |
| C | -3.152018 | 5.174715  | 17.615894 |
| C | -1.101622 | 6.214435  | 16.856548 |
| O | 0.876458  | 7.186751  | 16.025511 |
| C | 6.147540  | 3.514560  | -2.183711 |
| C | 7.094617  | 5.383296  | -0.966870 |
| O | 7.894604  | 7.186751  | 0.304053  |
| H | 6.514923  | 7.732882  | 2.232447  |
| H | -1.514669 | -2.425482 | 13.489011 |
| O | -2.894349 | -1.879350 | 15.417405 |
| C | -2.094362 | -0.075896 | 16.688328 |
| C | -1.147285 | 1.792840  | 17.905169 |
| C | 0.138340  | -1.792840 | -2.183711 |
| C | 2.176420  | -0.774350 | -2.947773 |
| O | 3.143186  | 1.023267  | -1.812999 |
| O | 1.857069  | 4.284133  | 17.534457 |
| C | 2.823835  | 6.081750  | 18.669232 |
| C | 4.861915  | 7.100240  | 17.905169 |
| O | -3.143186 | -1.023267 | 1.812999  |
| O | -1.885403 | -1.879350 | -0.304053 |
| O | 8.143440  | 6.330667  | 13.908460 |
| O | 6.885658  | 7.186751  | 16.025511 |
| O | 8.647913  | 1.630433  | 6.047731  |
| O | -3.647659 | 3.676967  | 9.673728  |
| C | 6.147540  | -1.792840 | -2.183711 |

|   |           |           |           |
|---|-----------|-----------|-----------|
| C | 8.185620  | -0.774350 | -2.947773 |
| O | 9.152386  | 1.023267  | -1.812999 |
| O | -4.152131 | 4.284133  | 17.534457 |
| C | -3.185365 | 6.081750  | 18.669232 |
| C | -1.147285 | 7.100240  | 17.905169 |
| H | 5.503477  | 2.881918  | -2.232447 |
| C | 7.203086  | 3.595233  | -3.097127 |
| C | 8.152273  | 5.440085  | -1.894436 |
| C | -3.152018 | -0.132685 | 17.615894 |
| C | -2.202831 | 1.712167  | 18.818586 |
| H | -0.503222 | 2.425482  | 17.953906 |
| H | -0.505723 | -2.425482 | -2.232447 |
| C | 1.193886  | -1.712167 | -3.097127 |
| H | 2.914134  | -0.705884 | -3.553050 |
| H | 3.001098  | 1.570990  | -1.069059 |
| H | 1.999157  | 3.736410  | 16.790518 |
| H | 2.086121  | 6.013284  | 19.274508 |
| C | 3.806369  | 7.019568  | 18.818586 |
| H | 5.505978  | 7.732882  | 17.953906 |
| H | -3.001098 | -1.570990 | 1.069059  |
| H | 8.001353  | 6.878391  | 14.652399 |
| H | 8.505825  | 1.082710  | 6.791670  |
| H | -3.505571 | 4.224691  | 8.929788  |
| H | 5.503477  | -2.425482 | -2.232447 |
| C | 7.203086  | -1.712167 | -3.097127 |
| H | 8.923334  | -0.705884 | -3.553050 |
| H | 9.010298  | 1.570990  | -1.069059 |
| H | -4.010043 | 3.736410  | 16.790518 |
| H | -3.923080 | 6.013284  | 19.274508 |
| C | -2.202831 | 7.019568  | 18.818586 |
| H | -0.503222 | 7.732882  | 17.953906 |
| H | 7.206810  | 3.014603  | -3.773150 |
| C | 8.185620  | 4.533051  | -2.947773 |

|   |           |           |           |
|---|-----------|-----------|-----------|
| O | 9.152386  | 6.330667  | -1.812999 |
| O | -4.152131 | -1.023267 | 17.534457 |
| C | -3.185365 | 0.774350  | 18.669232 |
| H | -2.206555 | 2.292797  | 19.494608 |
| H | 1.197610  | -2.292797 | -3.773150 |
| H | 3.802645  | 7.600197  | 19.494608 |
| H | 7.206810  | -2.292797 | -3.773150 |
| H | -2.206555 | 7.600197  | 19.494608 |
| H | 8.923334  | 4.601516  | -3.553050 |
| H | 9.010298  | 6.878391  | -1.069059 |
| H | -4.010043 | -1.570990 | 16.790518 |
| H | -3.923080 | 0.705884  | 19.274508 |



## Acknowledgement

We thank I. Nevoigt for carrying out the XRD measurements. We thank R. Schubert for carrying out the TEM measurements, and training H. Hwang to operate AFM and analyse the data using their software.

## References

1. Han, H., et al., *The XBI BioLab for life science experiments at the European XFEL*. J Appl Crystallogr, 2021. **54**(Pt 1): p. 7-21.
2. Yan, Y., et al., *Fundamental Flaw in the Current Construction of the TiO<sub>2</sub> Electron Transport Layer of Perovskite Solar Cells and Its Elimination*. ACS Appl Mater Interfaces, 2021. **13**(33): p. 39371-39378.
3. M. J. Frisch, G.W.T., H. B. Schlegel, G. E. Scuseria, , et al., *Gaussian 09, Revision D.01*. 2013, Gaussian, Inc.: Wallingford CT.
4. Marasinghe, P.A.B. and G.D. Gillispie, *Structure of 1,5-dihydroxyanthraquinone: a redetermination*. Acta Crystallographica Section C Crystal Structure Communications, 1993. **49**(1): p. 113-114.
